# Supplementary material for: The Longevity of Colonies of Fungus-Growing Termites and the Stability of the Symbiosis
Source: MDPI journal article supplement (doi:10.3390/insects11080527), 2020-08-13
Supplement: s1 [file s1]

**Table S1.** Open questions and possible approaches to answer these questions. Grouped by subject.

| Subject                                                                                         | Open Questions                                                                                                        | Possible Approaches                                                                                                                                                  |
|-------------------------------------------------------------------------------------------------|-----------------------------------------------------------------------------------------------------------------------|----------------------------------------------------------------------------------------------------------------------------------------------------------------------|
| <b>The Stability of the Termite Mound</b>                                                       | Is an abandoned eroding mound perceived as a good site to colonise?                                                   | Field study: Observe abandoned mounds and how often they are colonized compared to new sites.                                                                        |
|                                                                                                 | Is there higher survival of new colonies in existing mounds?                                                          | Field study: Observe colonized abandoned mounds and score the survival of the colony compared to the survival at new sites.                                          |
|                                                                                                 | What is the maximum lifespan of reproductives of colonies in different species of fungus-growing termites?            | Field study: Long-term observation of different termite species with the frequent observation of the survival of marked 1eproductive.                                |
| <b>How Short-Term Stability of the Symbiont May Affect Long-Term Stability of the Symbiosis</b> |                                                                                                                       |                                                                                                                                                                      |
| <i>Symbiont transmission and dispersal</i>                                                      | What is the mechanism behind the timing between fruiting and the appearance of new workers?                           | Field experiment/lab colonies: Change conditions by removing termites, changing temperature or humidity level, observe if these factors affect fungal fruiting.      |
| <i>Selection of the “right” partner</i>                                                         | How does specificity arise and how do certain host-symbiont combinations arise?                                       | Comparative phylogenetic analysis: Study the correlation of specific species combinations with specific environmental factors.                                       |
|                                                                                                 | Do environmental factors explain variation in fungal symbionts between mounds of the same termite species?            | Field observations combined with comparative analysis: Measure environmental factors and study correlations between these factors and fungal symbionts.              |
|                                                                                                 | To what extent can the termite control environmental factors of a colony, and what is the flexibility within species? | Field observations: Measure environmental factors (e.g., temperature, moisture level and construction of the termite mound), and compare different termite colonies. |
|                                                                                                 | Do termite species show flexibility in the way they build their mounds?                                               | Field observations: Study fungal mounds of the same termite species at different sites.                                                                              |

|                                                                    |                                                                                                                                                         |                                                                                                                                                                                                                                                                             |
|--------------------------------------------------------------------|---------------------------------------------------------------------------------------------------------------------------------------------------------|-----------------------------------------------------------------------------------------------------------------------------------------------------------------------------------------------------------------------------------------------------------------------------|
|                                                                    | Do environmental factors affect the establishment of a particular fungal symbiont?                                                                      | Field observations combined with field experiments/lab colonies: Study correlations between environmental factors and certain fungal symbionts, and manipulate environmental factors to see if this affects the establishment of fungal species.                            |
|                                                                    | How is the growth of <i>Termitomyces</i> affected by different environmental factors?                                                                   | Lab experiment: Cultivate fungal species on different substrates and environmental conditions and measure growth.                                                                                                                                                           |
|                                                                    | Can the fungus trigger termite behaviors to change the environmental conditions?                                                                        | Field experiment/lab colonies: Manipulate fungal growth and measure termite behavior, rear termite species with different fungi.                                                                                                                                            |
|                                                                    | How many <i>Termitomyces</i> species are brought into the primordial comb by the first termite workers?                                                 | Field observations/lab colonies and genetic analysis: Sample fungi right after the establishment of a new termite colony, genetically compare the different samples to study genetic variation.                                                                             |
|                                                                    | Is there competition between different <i>Termitomyces</i> species in the primordial comb?                                                              | Field observations/lab colonies and genetic analysis: Continue sampling after the establishment of a colony and study changes in genetic frequency.                                                                                                                         |
|                                                                    | Do the termites actively select <i>Termitomyces</i> species, or is this a passive process?                                                              | Field experiment/lab colonies: Expose termites to different <i>Termitomyces</i> species all equally well adapted to that environment in different frequencies and observe if the termites select and maintain their adapted <i>Termitomyces</i> species in all frequencies. |
|                                                                    | Do termites react differently to different <i>Termitomyces</i> species?                                                                                 | Field experiment/lab colonies: Expose termites to different <i>Termitomyces</i> species and observe their behavior.                                                                                                                                                         |
|                                                                    | Is there any active selection of a specific fungal strain, or is the whole process passive and just depending on density and performance of the fungus? | Field experiment/lab colonies: Expose termites to different <i>Termitomyces</i> strains all equally well adapted to that environment in different frequencies and observe if the termites select and maintain a specific <i>Termitomyces</i> strain in all frequencies.     |
| <i>Conflict Reduction between Termite Host and Fungal Symbiont</i> | How do the termites suppress fruiting of their fungal symbiont?                                                                                         | Field experiments and observations/lab colonies: Exclude termites from certain fungal combs, and observe fungal growth, observe termite behavior around fungi.                                                                                                              |
|                                                                    | How does the fungus influence the reproduction of termites?                                                                                             | RNA expression analysis: Measure if expression levels change when termites reproduce.                                                                                                                                                                                       |
|                                                                    | Has <i>Termitomyces</i> evolved mechanisms to influence termite behavior?                                                                               | Genetic analysis: Comparison with free-living relatives and scan for genes which might cause the expression of exudates which might affect termites.                                                                                                                        |

|                                                                                        |                                                                                                                                             |                                                                                                                                                                                                                                                       |
|----------------------------------------------------------------------------------------|---------------------------------------------------------------------------------------------------------------------------------------------|-------------------------------------------------------------------------------------------------------------------------------------------------------------------------------------------------------------------------------------------------------|
| Conflict between Symbionts:<br>Establishment and Maintenance of<br>Fungal Monocultures | How is the monoculture established in<br>primordial combs, which selection pressures<br>play a role?                                        | Field observations/lab colonies and genetic analysis: Continue<br>sampling after the establishment of a colony and study changes in<br>genetic frequency. Alternatively, controlled experiments with lab<br>colonies.                                 |
|                                                                                        | How long does it take to form a monoculture?                                                                                                | Field observations/lab colonies and genetic analysis: Continue<br>sampling after the establishment of a colony and study changes in<br>genetic frequency.                                                                                             |
|                                                                                        | How long does it take to select the dominant<br>heterokaryon and to eliminate the less<br>frequent heterokaryons?                           | Field observations/lab colonies and genetic analysis: Continue<br>sampling after the establishment of a colony and study changes in<br>genetic frequency.                                                                                             |
|                                                                                        | Does fungal turnover occur over time?                                                                                                       | Long-term field observations/lab colonies and genetic analysis:<br>Continue sampling after the establishment of a colony and study<br>changes in genetic frequency; expose termites in the lab to spores of<br>different <i>Termitomyces</i> species. |
|                                                                                        | Which mechanisms underlie the maintenance<br>of a monoculture? Only positive frequency-<br>dependent selection or also other<br>mechanisms? | Field observations/lab colonies: Continue studying the termite<br>behavior after the establishment of a colony.                                                                                                                                       |
|                                                                                        | How does the termite prevent cheating nuclei<br>or cells from spreading?                                                                    | Field observations and experiments/lab colonies: Continue studying<br>the termite behavior after the establishment of a colony and introduce<br>cheating mutants to the fungal comb to observe how termites react to<br>such mutants.                 |
|                                                                                        | Are termites able to discriminate between<br>cooperators and cheaters?                                                                      | Field experiments/lab colonies: Introduce cheating mutants to the<br>fungal comb to observe how termites react to such mutants.                                                                                                                       |
|                                                                                        | Do the termites have mechanisms to prevent<br>the spread of cheaters?                                                                       | Field experiments/lab colonies: Introduce cheating mutants to the<br>fungal comb to observe how termites react to such mutants.                                                                                                                       |
|                                                                                        | Is the mutation rate of <i>Termitomyces</i> reduced,<br>and how?                                                                            | Lab experiments: Long-term evolution experiment to sequentially<br>transfer fungi, study the accumulation of mutations.                                                                                                                               |
|                                                                                        | Do the termites carefully monitor the fungi for<br>mutations?                                                                               | Field experiments/lab colonies: Introduce cheating mutants to the<br>fungal comb to observe how termites react to such mutants.                                                                                                                       |
